# Supplementary material for: MicroRNA-Regulated Protein-Protein Interaction Networks and Their Functions in Breast Cancer
Source: MDPI journal article supplement (doi:10.3390/ijms140611560), 2013-05-30
Supplement: s1 [file s1]

## Supplementary Information

**Figure S1.** ROC curves and expression distribution of miRNAs. Expression profiles of NTUH miRNA dataset was used for validating our results. Solid line: actual prediction performance of the miRNA as diagnostic marker; dashed line: AUC = 0.5 (no predictive power). \*  $p$ -value < 0.05; \*\*  $p$ -value < 0.01; \*\*\*  $p$ -value < 0.001.

### A. hsa-let-7c. MIMAT0000064. \*\*\*

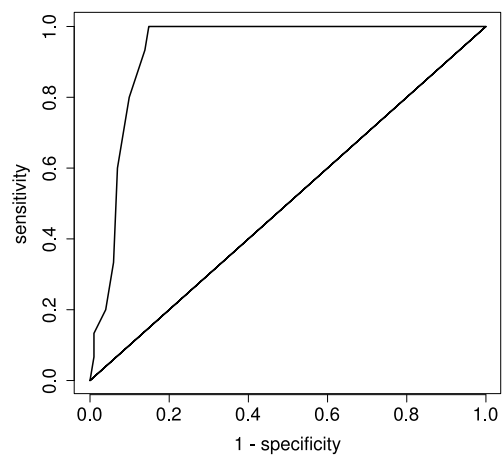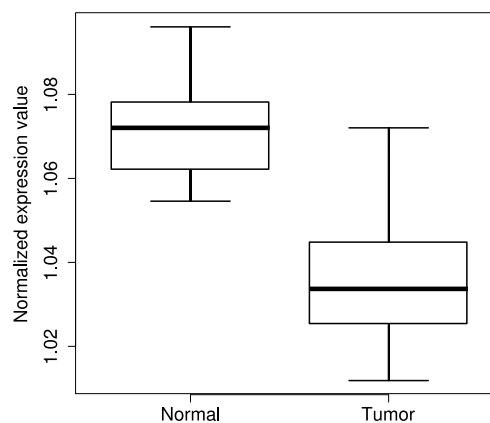

### B. hsa-miR-21-5p. MIMAT0000076. \*\*\*

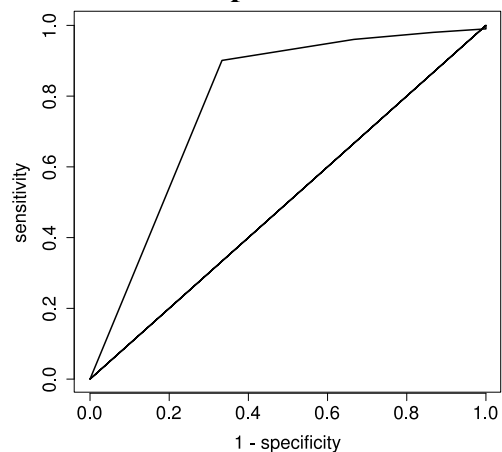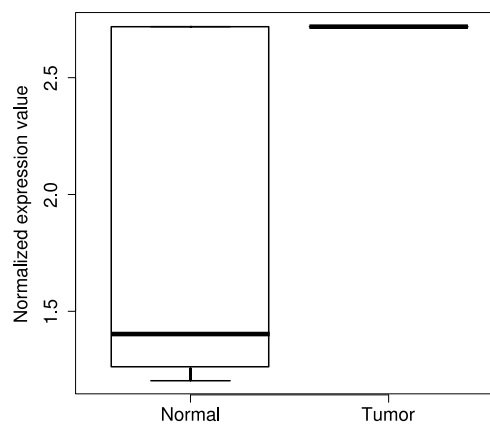

### C. hsa-miR-22-3p. MIMAT0000077.

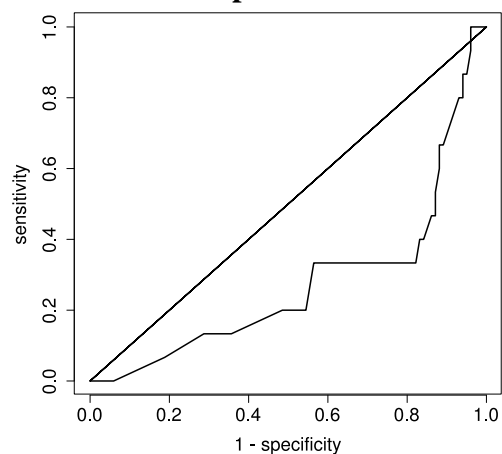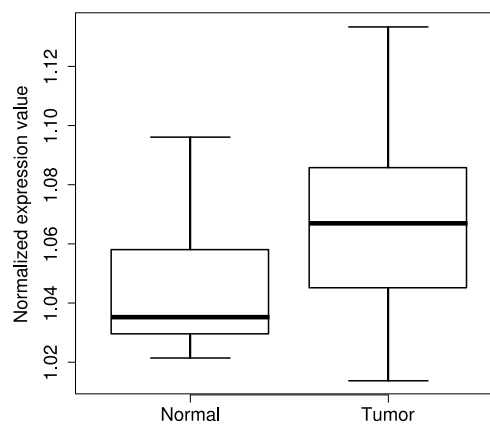

Figure S1. Cont.

**D. hsa-miR-31-5p. MIMAT0000089. \*\*\***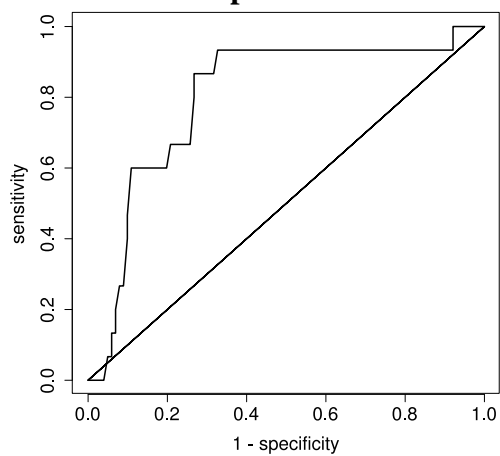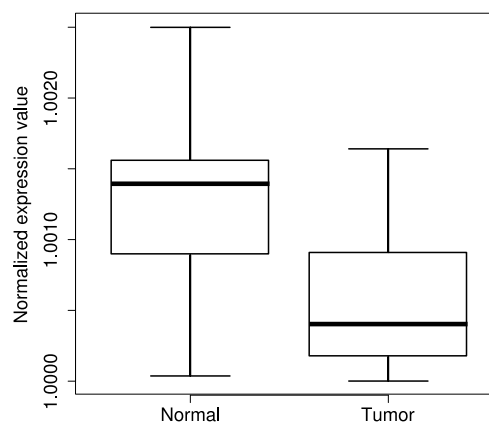**E. hsa-miR-99a-5p. MIMAT0000097. \*\*\***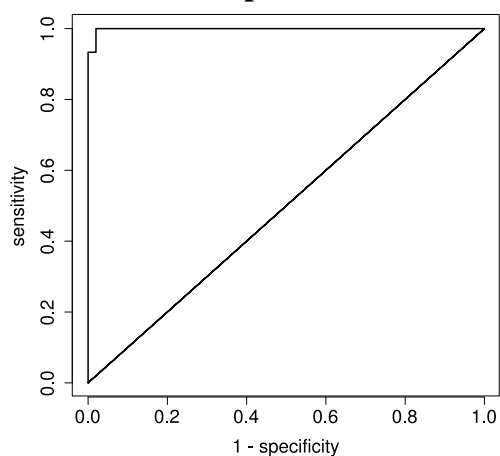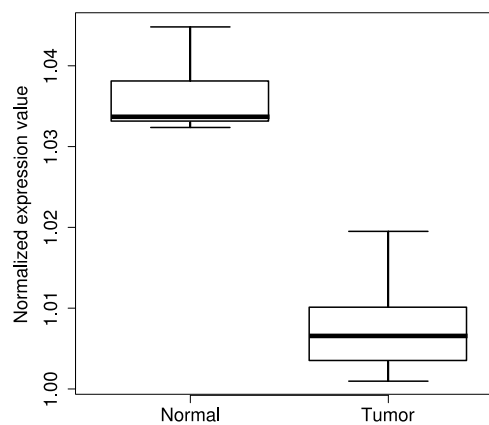**F. hsa-miR-100-5p. MIMAT0000098. \*\*\***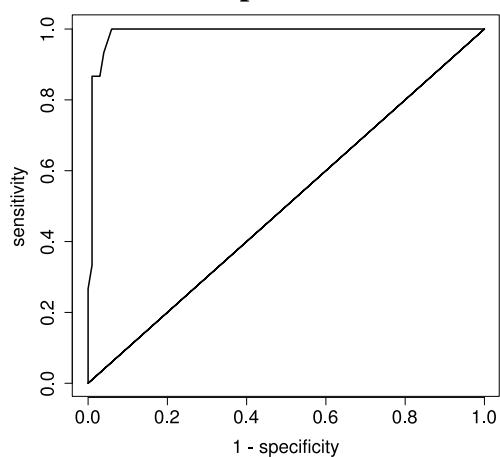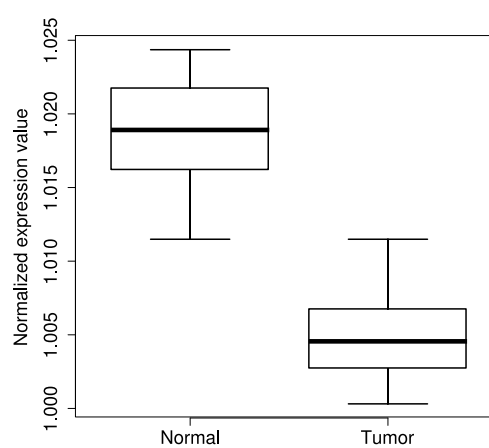

Figure S1. Cont.

**G. hsa-miR-139-5p. MIMAT0000250. \*\*\***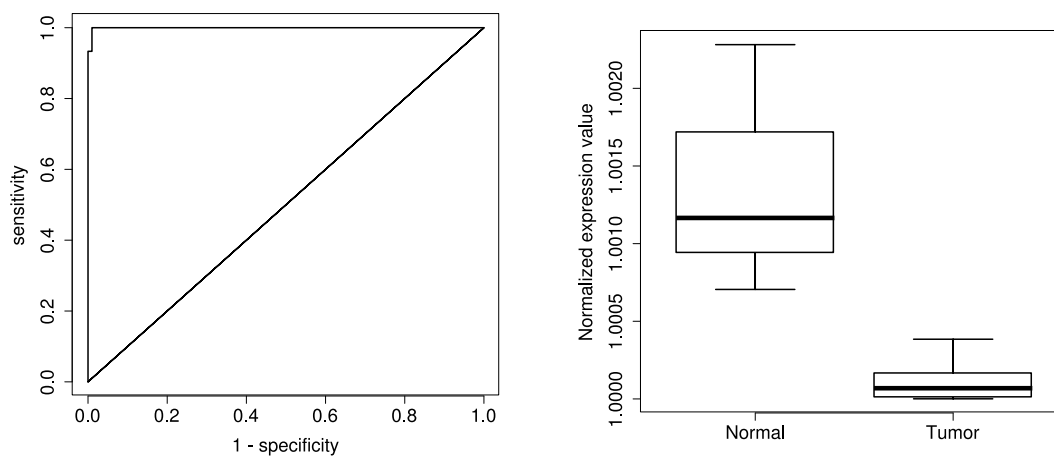**H. hsa-miR-204-5p. MIMAT0000265. \*\*\***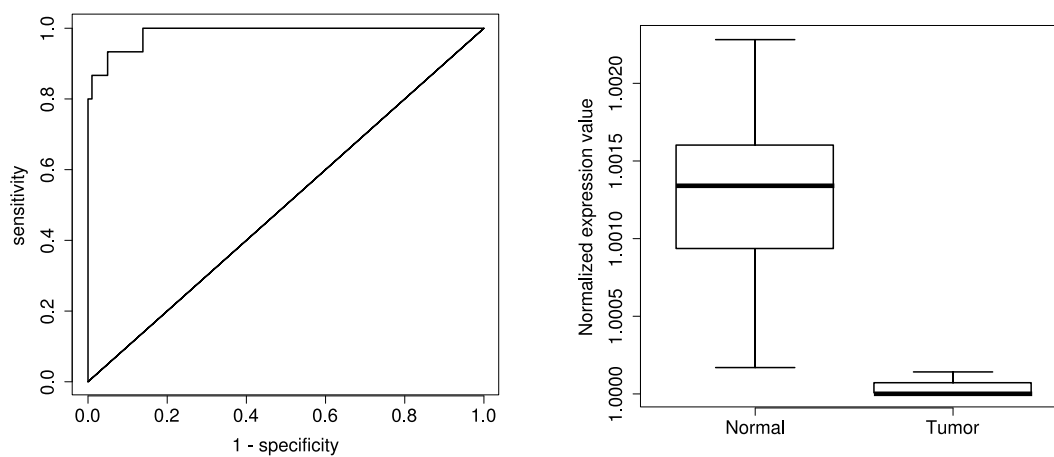**I. hsa-miR-214-3p. MIMAT0000271. \***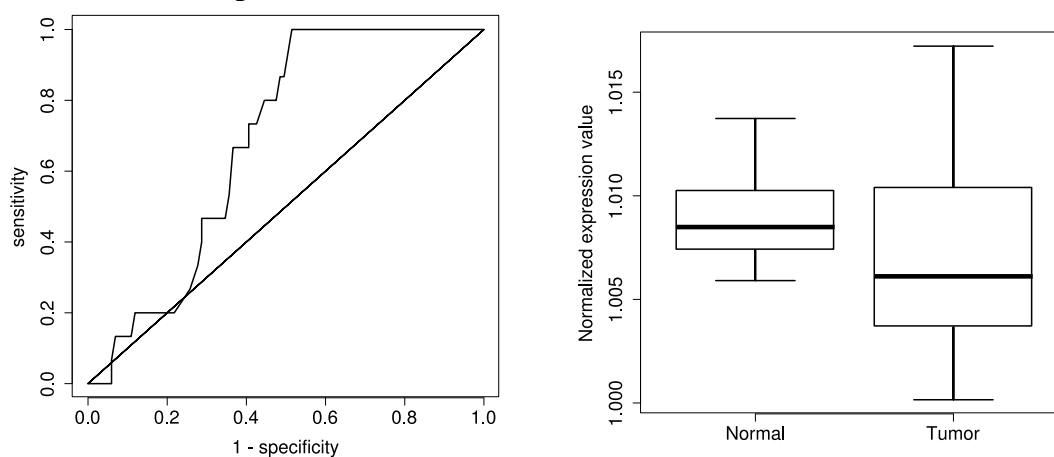

Figure S1. Cont.

**J. hsa-miR-215. MIMAT0000272.**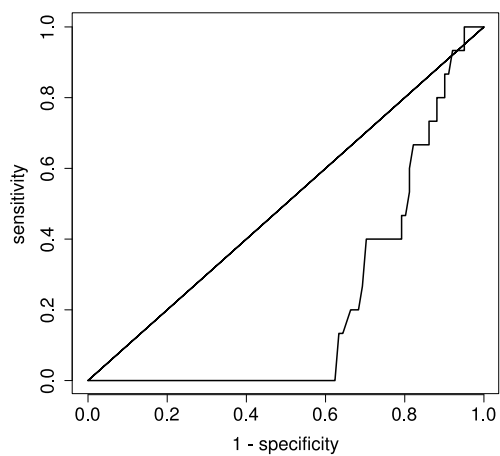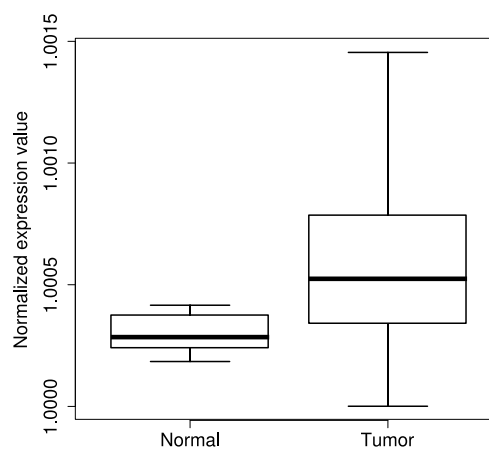**K. hsa-miR-122-5p. MIMAT0000421.**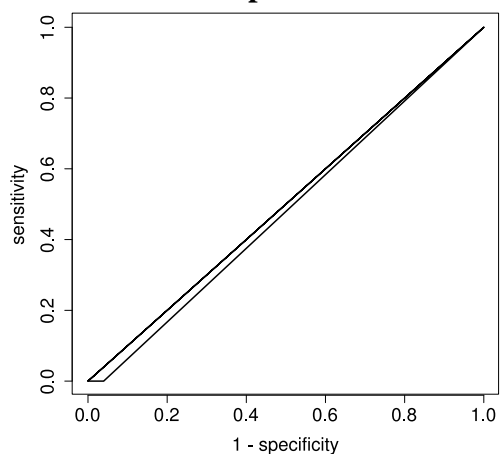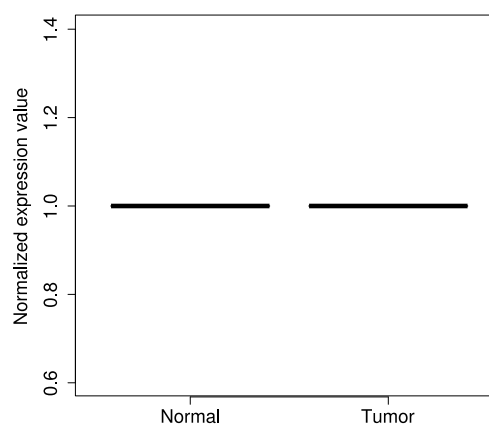**L. hsa-miR-125b-5p. MIMAT0000423. \*\*\***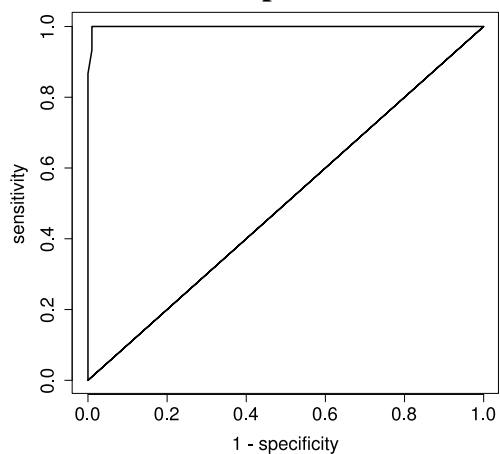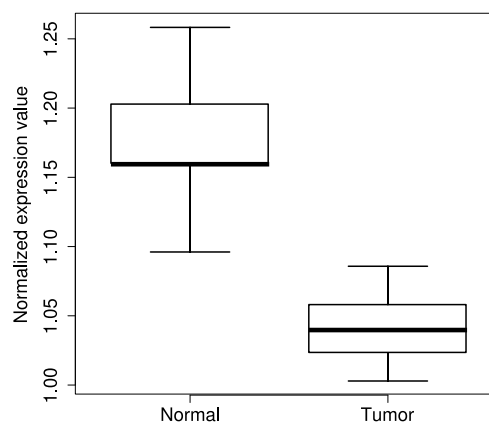

Figure S1. Cont.

**M. hsa-miR-145-5p. MIMAT0000437. \*\*\***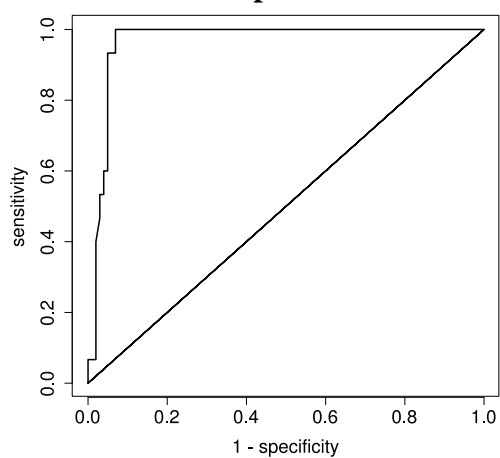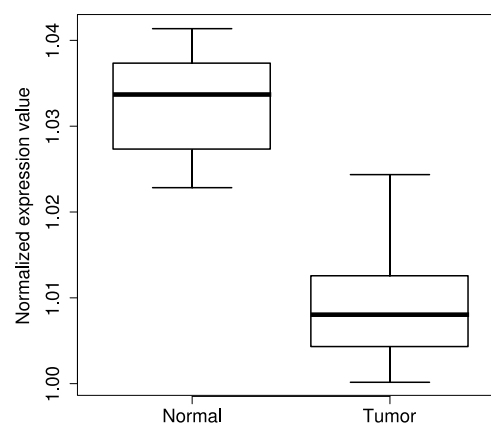**N. hsa-miR-125a-5p. MIMAT0000443.**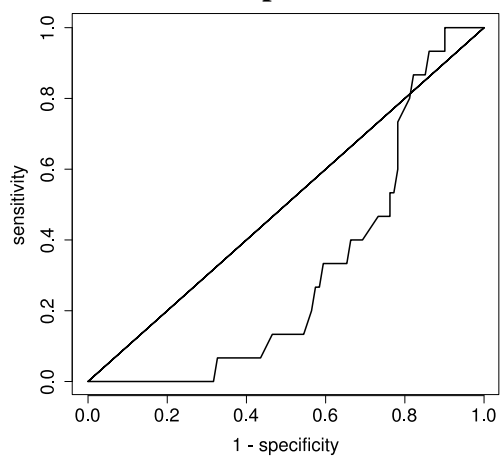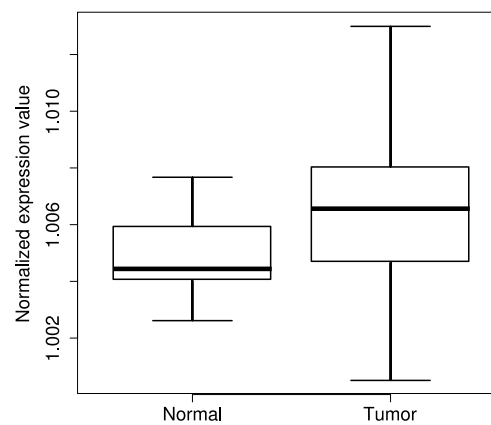**O. hsa-miR-383. MIMAT0000738.**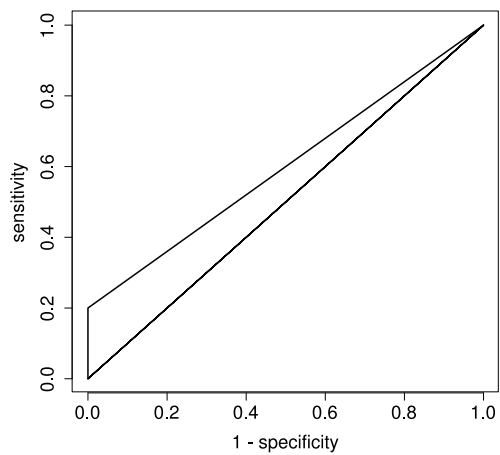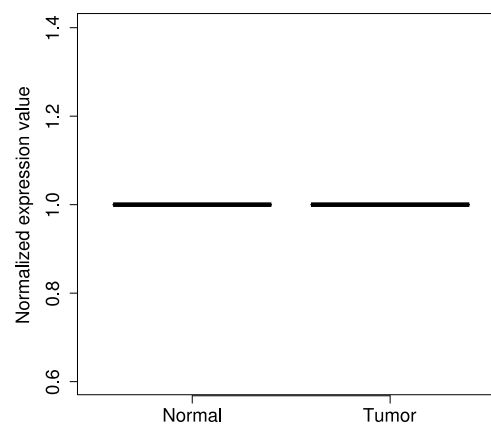

Figure S1. Cont.

**P. hsa-miR-193b-3p. MIMAT0002819.**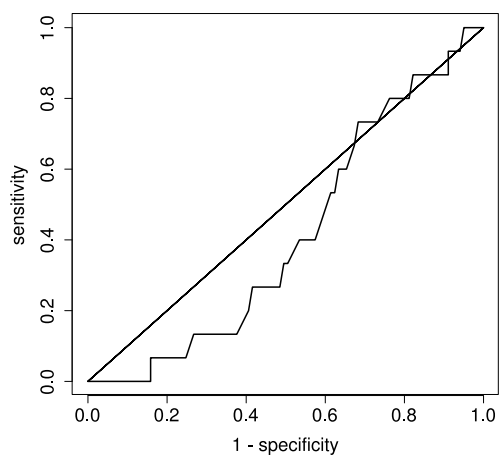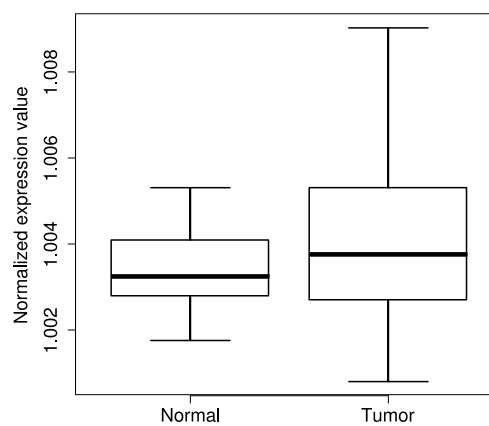**Q. hsa-miR-497-5p. MIMAT0002820. \*\*\***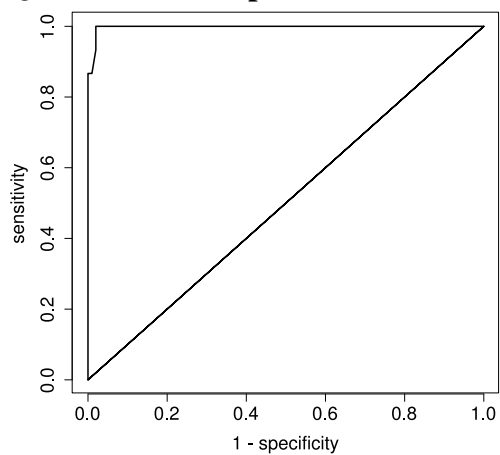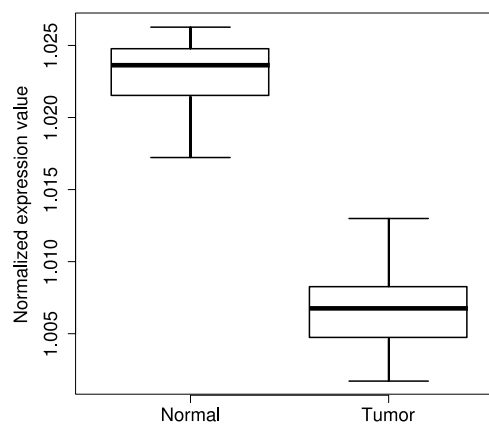**R. hsa-miR-520d-3p. MIMAT0002856.**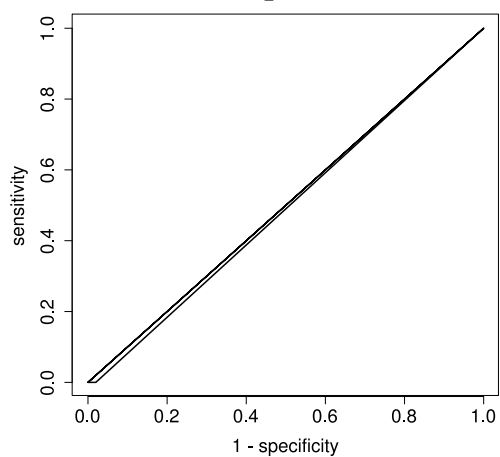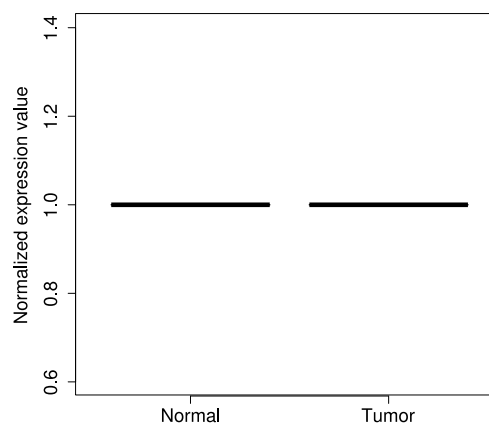

**Figure S2.** miRNA-regulated PIN. (hsa-miR-21-5p). **Red:** miRNA; **green:** direct target of the miRNA; **blue:** proteins interacting with direct target of the miRNA.

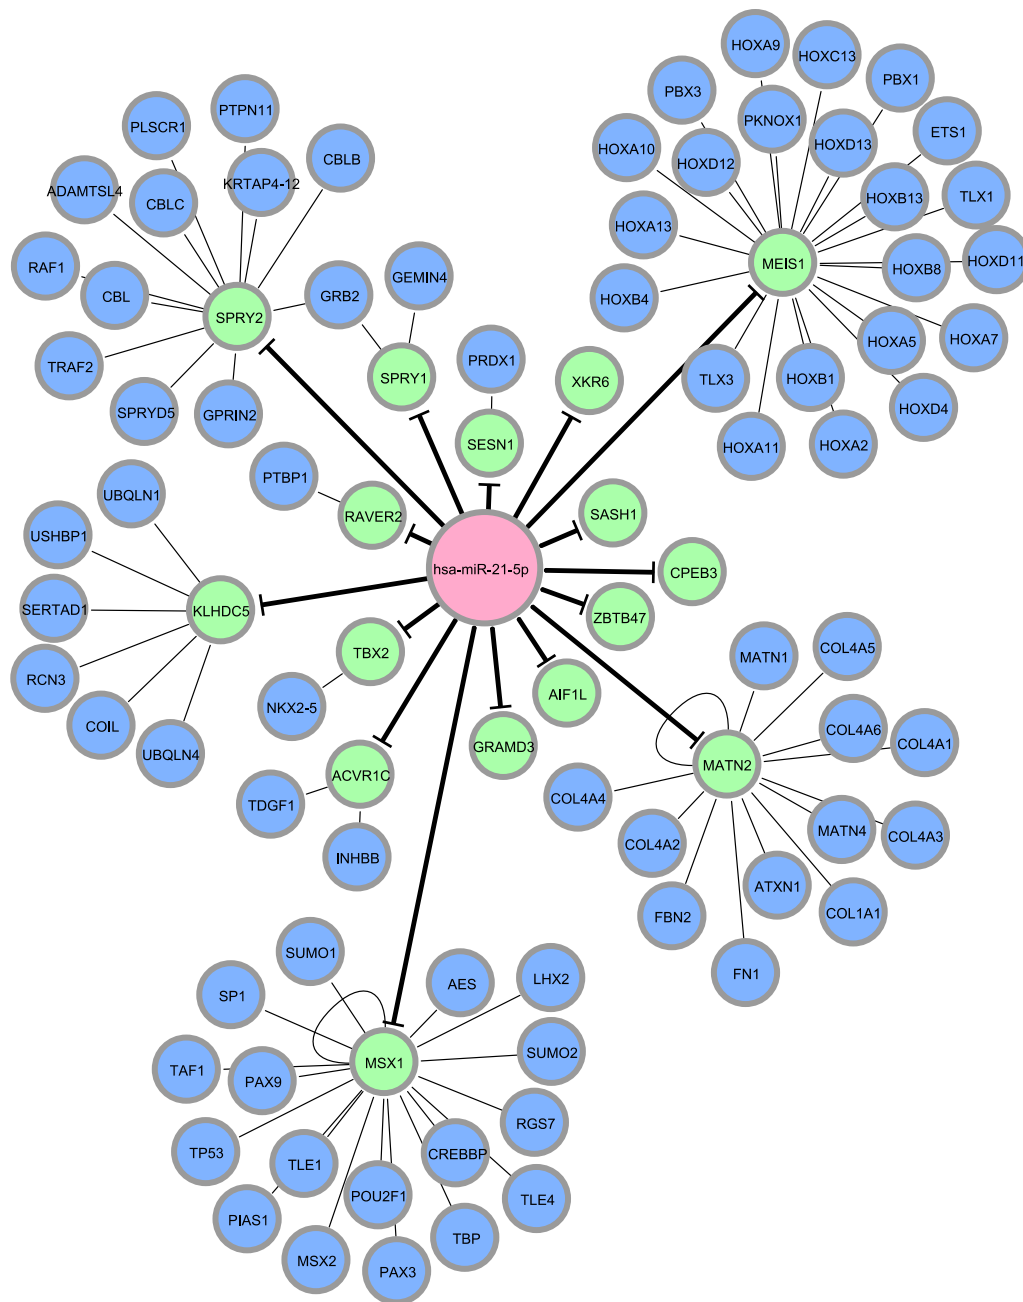

**Figure S3.** miRNA-regulate PIN. (hsa-miR-22-3p). **Red:** miRNA; **green:** direct target of the miRNA; **blue:** proteins interacting with direct target of the miRNA.

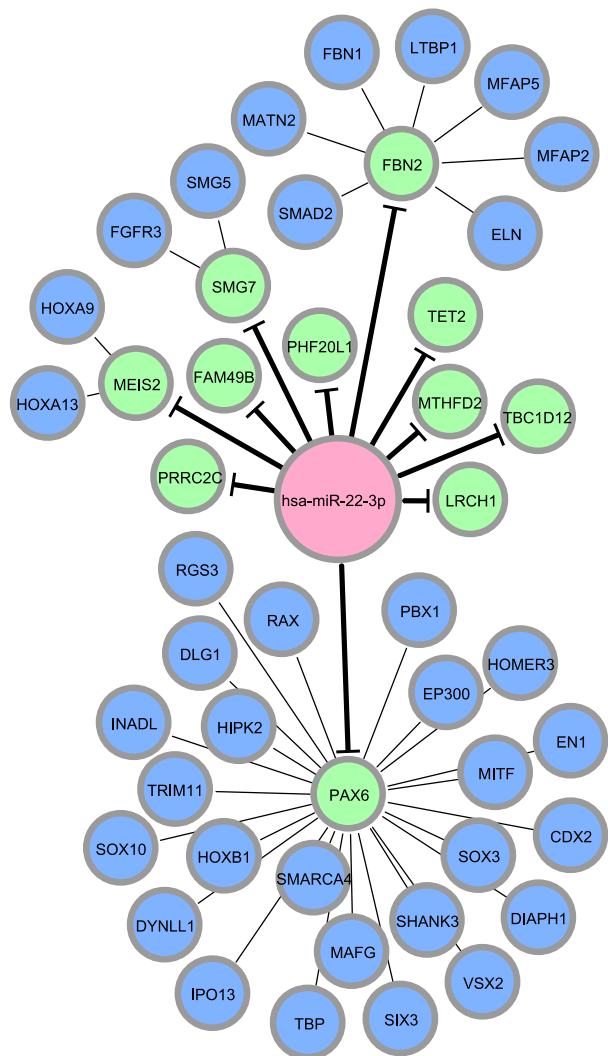

**Figure S4.** miRNA-regulated PINs. (hsa-miR-31-5p and hsa-miR-99a-5p). **Red:** miRNA; **green:** direct target of the miRNA; **blue:** proteins interacting with direct target of the miRNA.

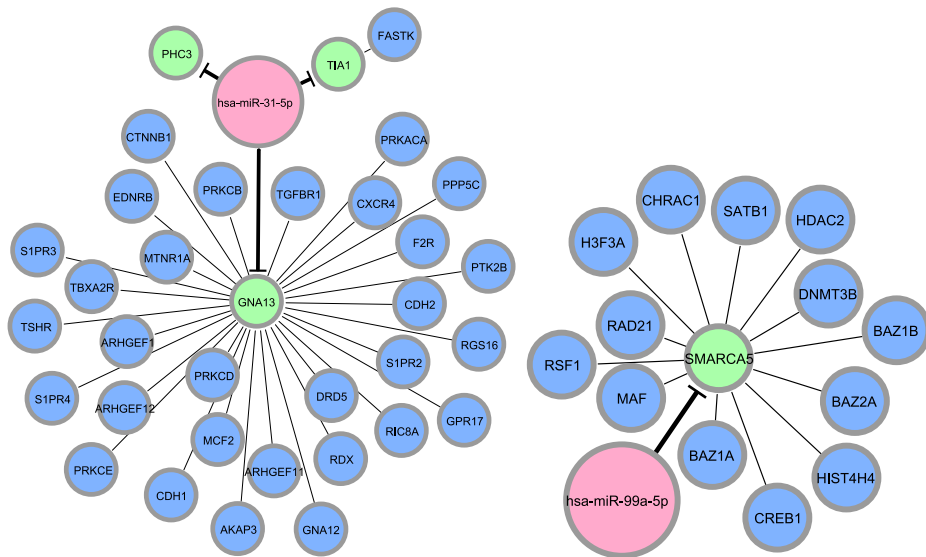



**Figure S5.** miRNA-regulated PINs. (hsa-miR-100-5p and hsa-miR-139-5p). **Red:** miRNA; **green:** direct target of the miRNA; **blue:** proteins interacting with direct target of the miRNA.

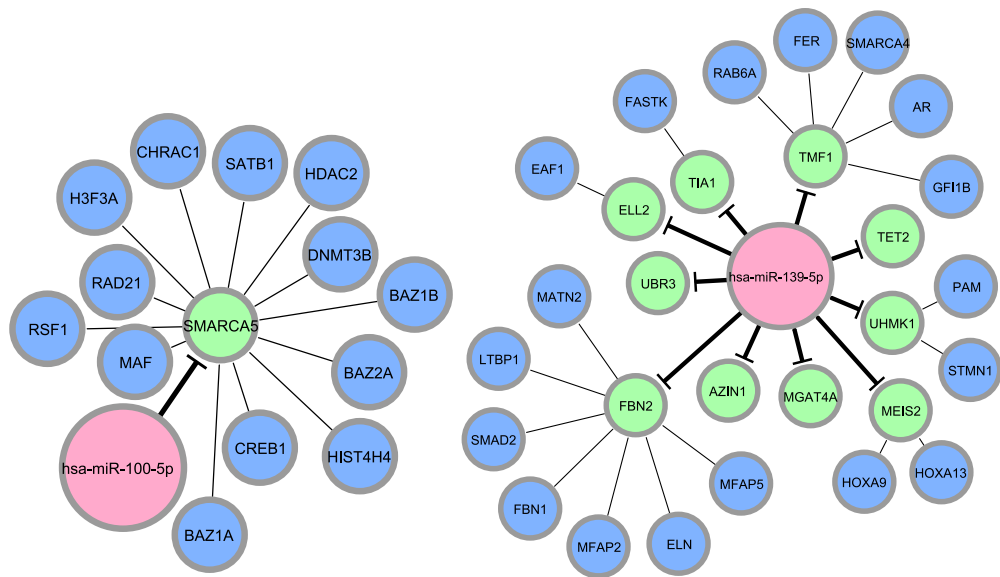

**Figure S6.** miRNA-regulated PIN. (hsa-204-5p). **Red:** miRNA; **green:** direct target of the miRNA; **blue:** proteins interacting with direct target of the miRNA.

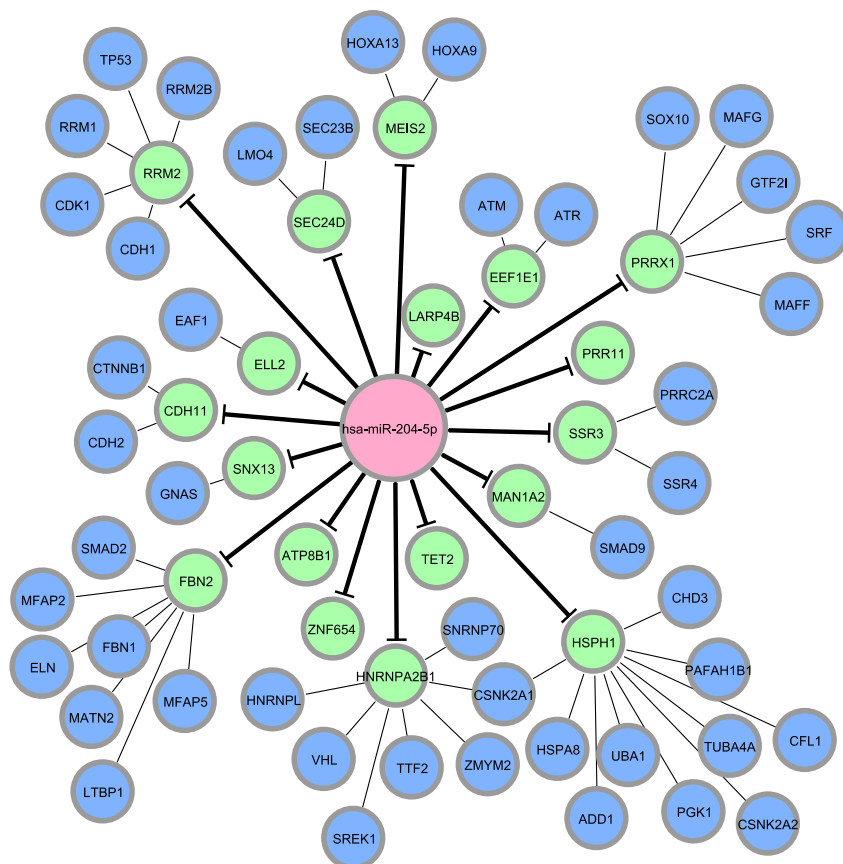

**Figure S7.** miRNA-regulated PINs. (hsa-miR-214-3p, hsa-miR-215, and hsa-miR-122-5p). **Red:** miRNA; **green:** direct target of the miRNA; **blue:** proteins interacting with direct target of the miRNA.

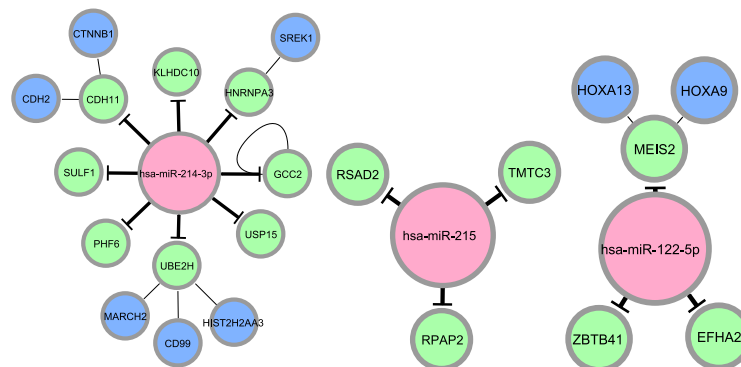

**Figure S8.** miRNA-regulated PIN. (hsa-miR-125b-5p). **Red:** miRNA; **green:** direct target of the miRNA; **blue:** proteins interacting with direct target of the miRNA.

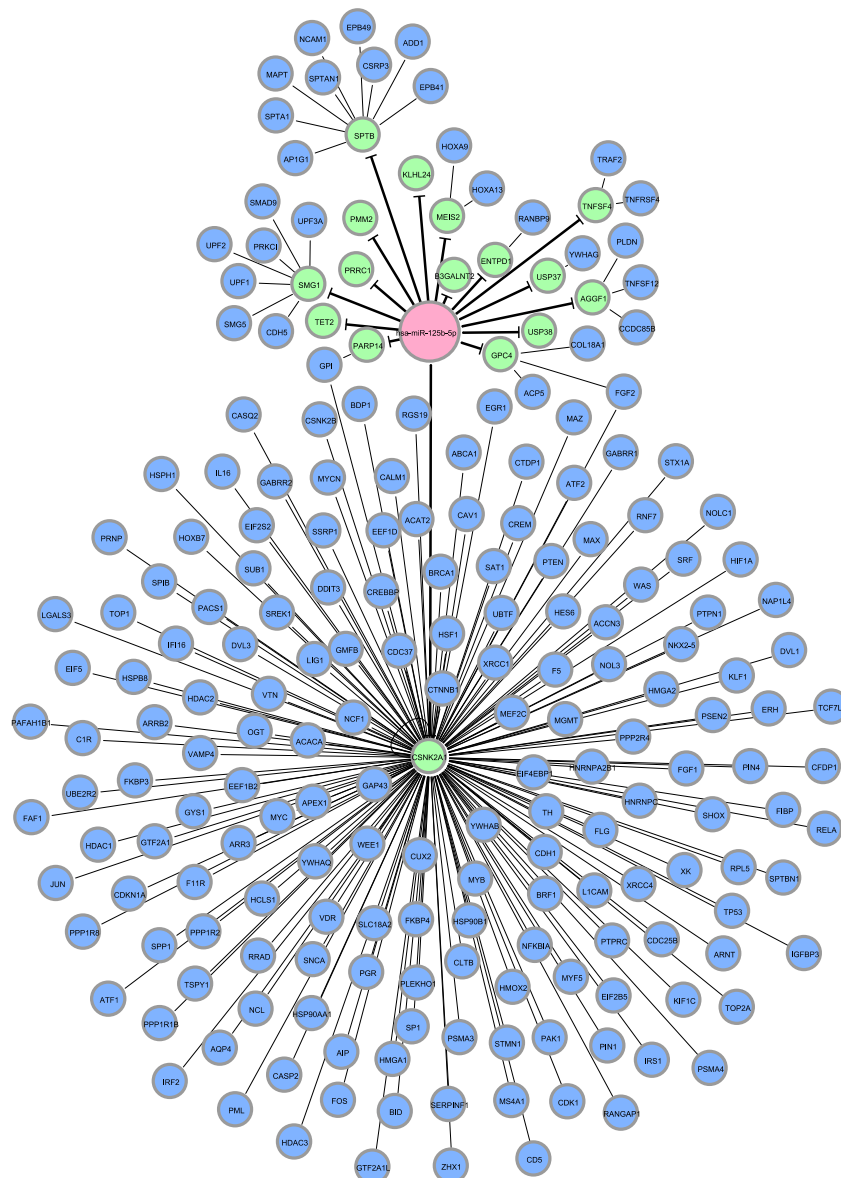

**Figure S9.** miRNA-regulated PIN. (hsa-miR-145-5p). **Red:** miRNA; **green:** direct target of the miRNA; **blue:** proteins interacting with direct target of the miRNA.

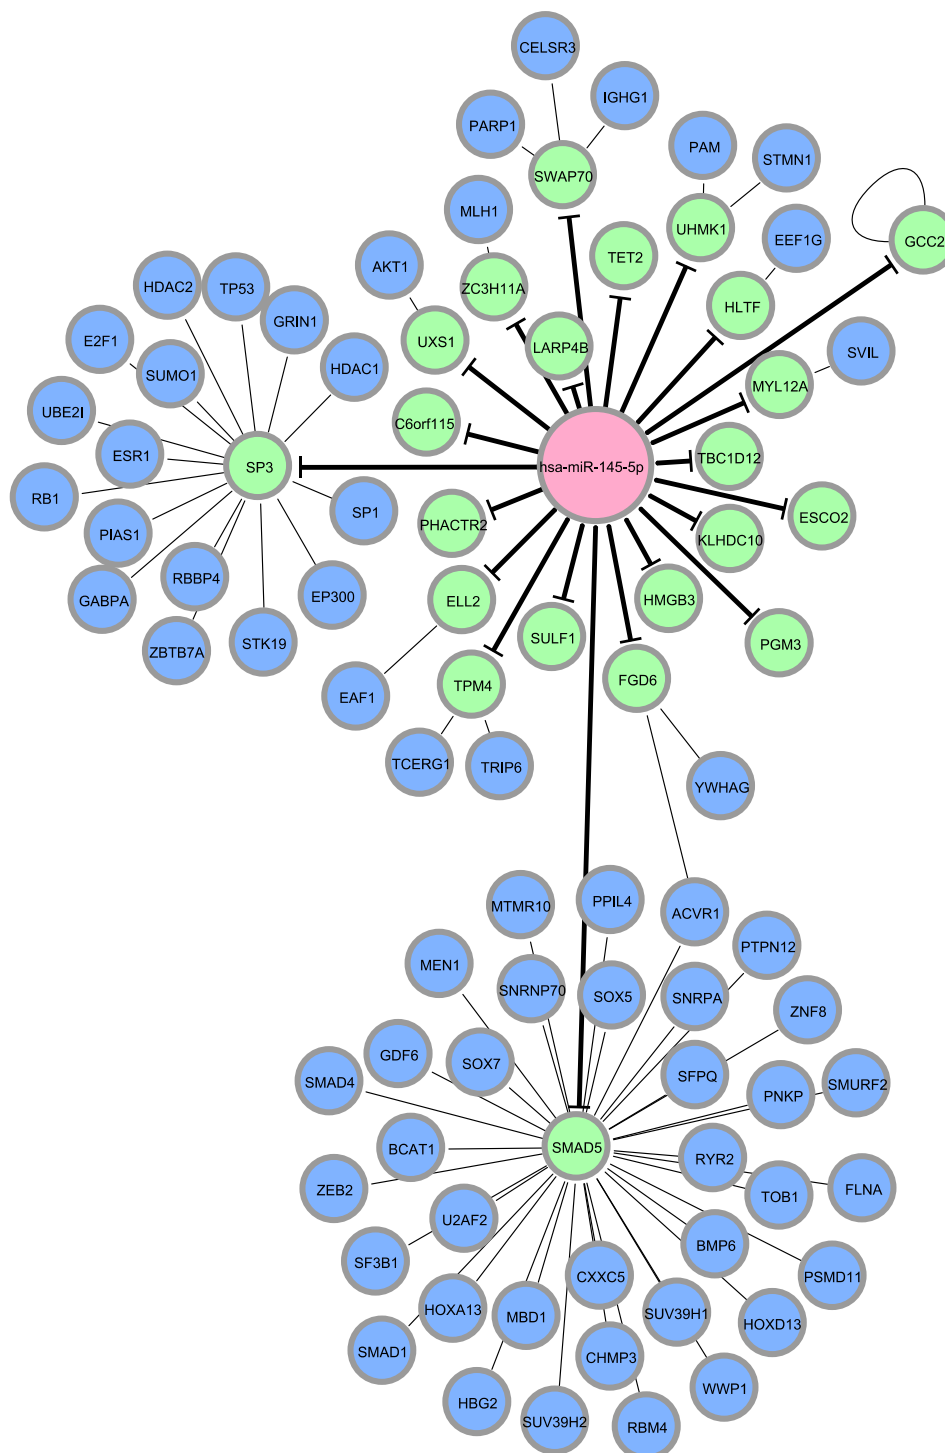

**Figure S10.** miRNA-regulated PIN. (hsa-miR-125a-5p). **Red:** miRNA; **green:** direct target of the miRNA; **blue:** proteins interacting with direct target of the miRNA.

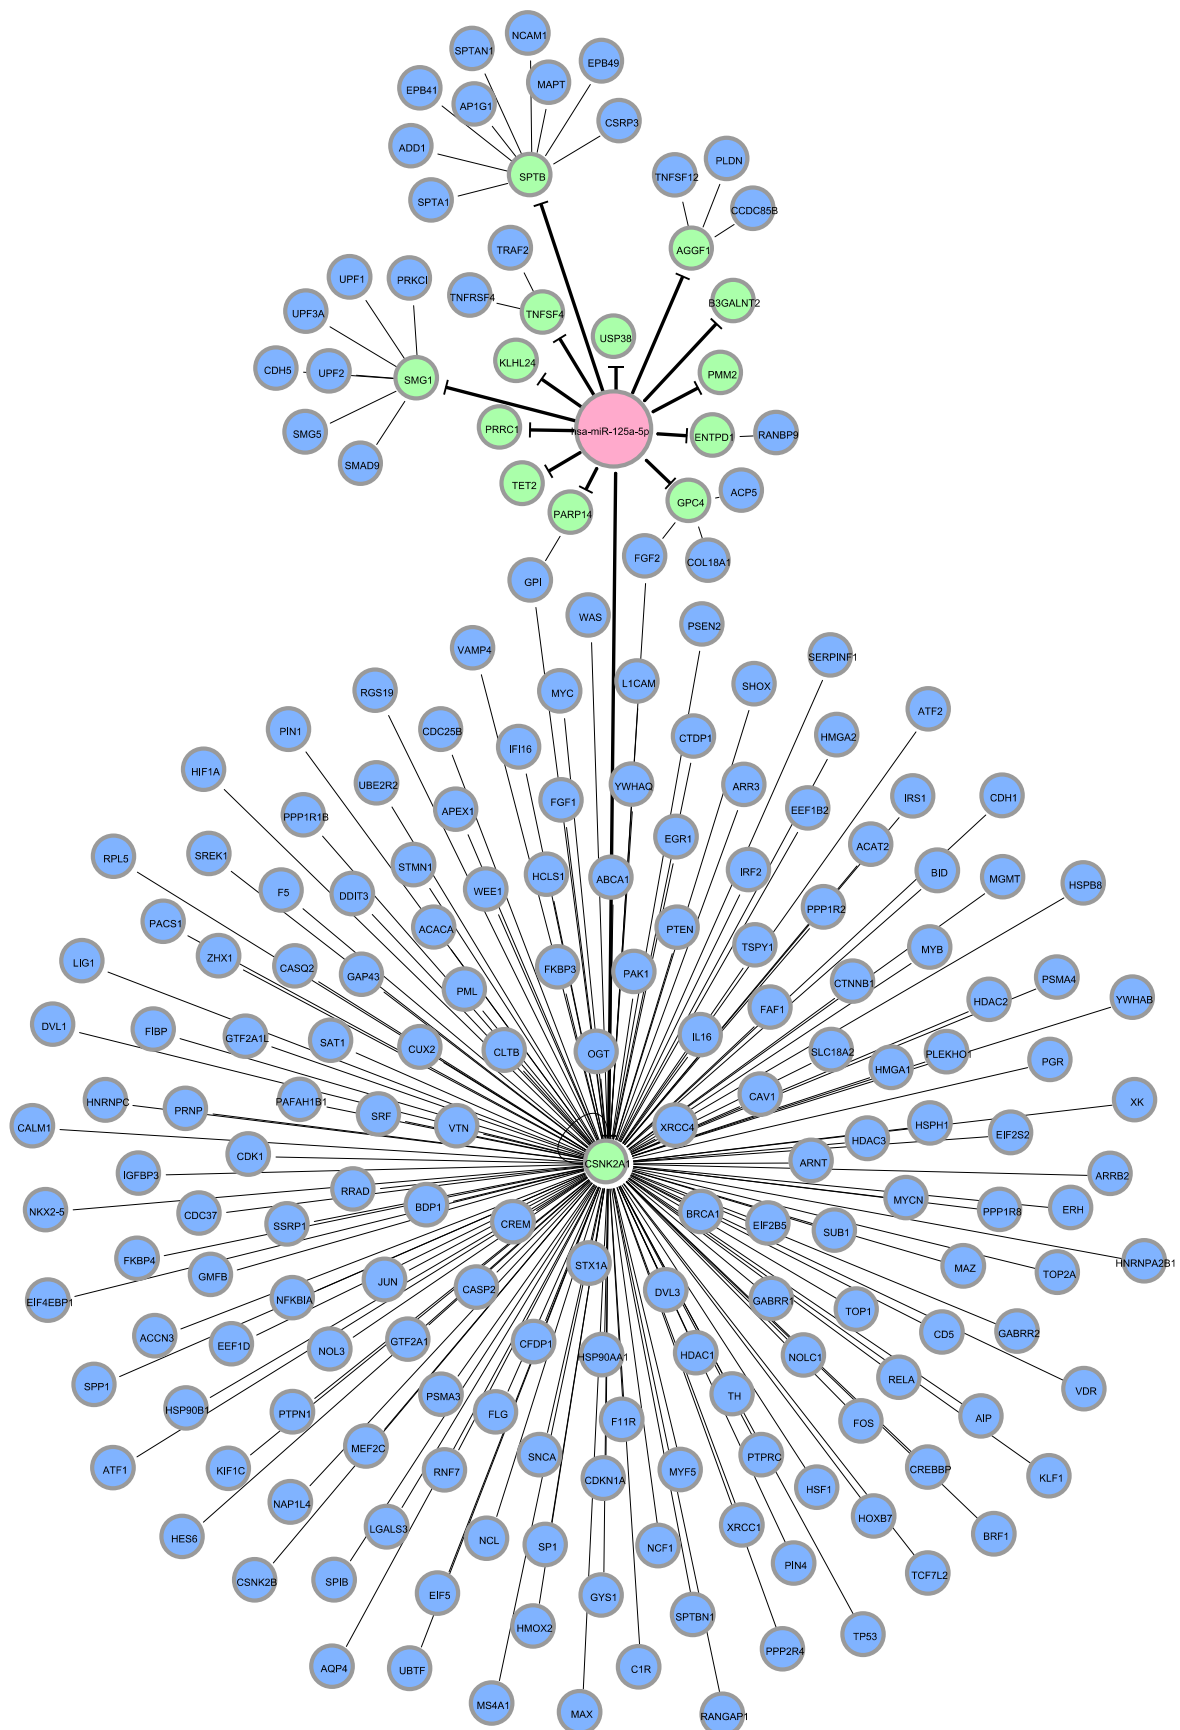

**Figure S11.** miRNA-regulated PINs. (hsa-miR-383 and hsa-miR-193b-3p). **Red:** miRNA; **green:** direct target of the miRNA; **blue:** proteins interacting with direct target of the miRNA.

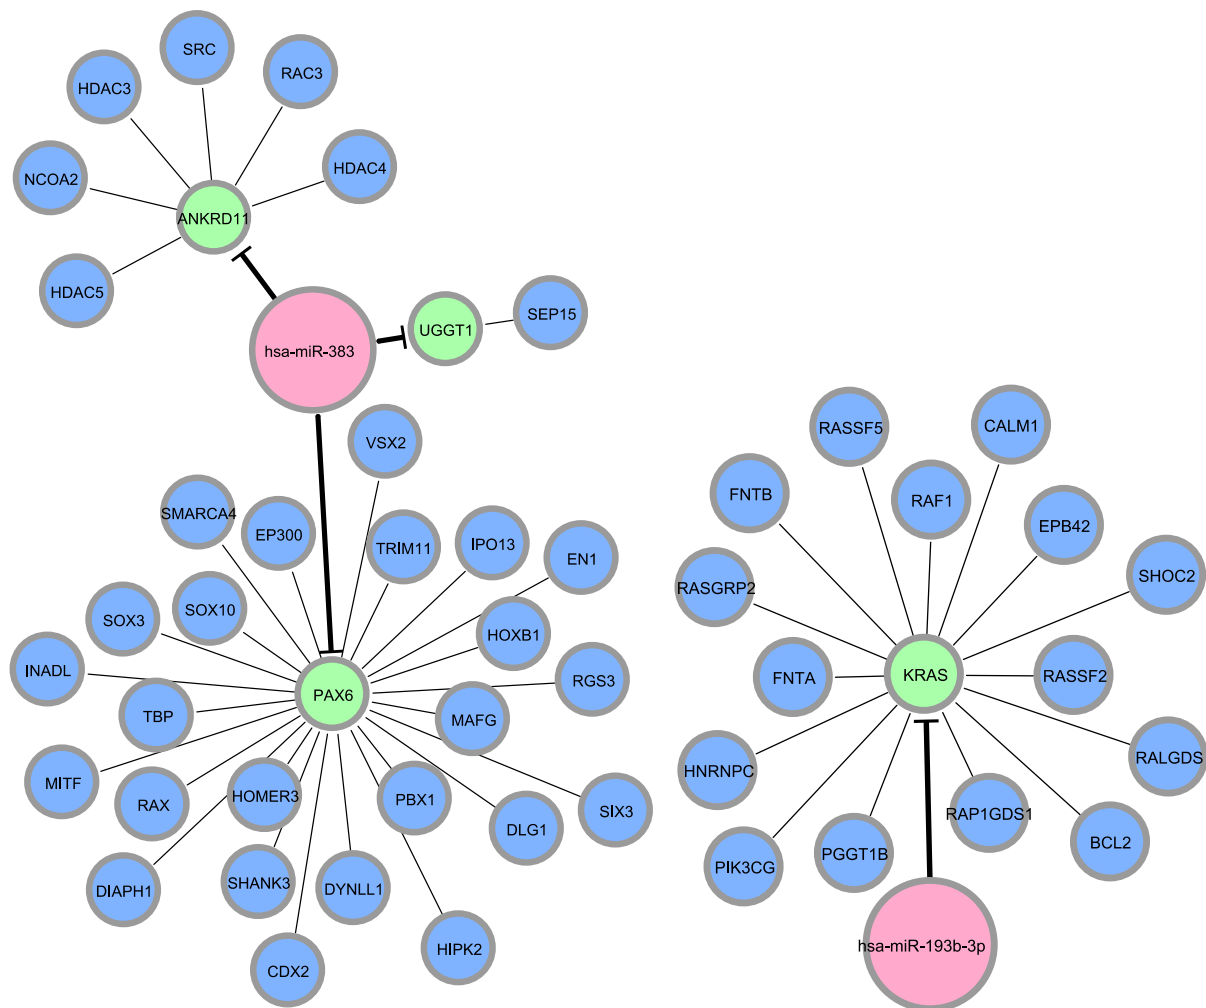

**Figure S12.** miRNA-regulated PIN. (hsa-miR-497-5p). **Red:** miRNA; **green:** direct target of the miRNA; **blue:** proteins interacting with direct target of the miRNA.

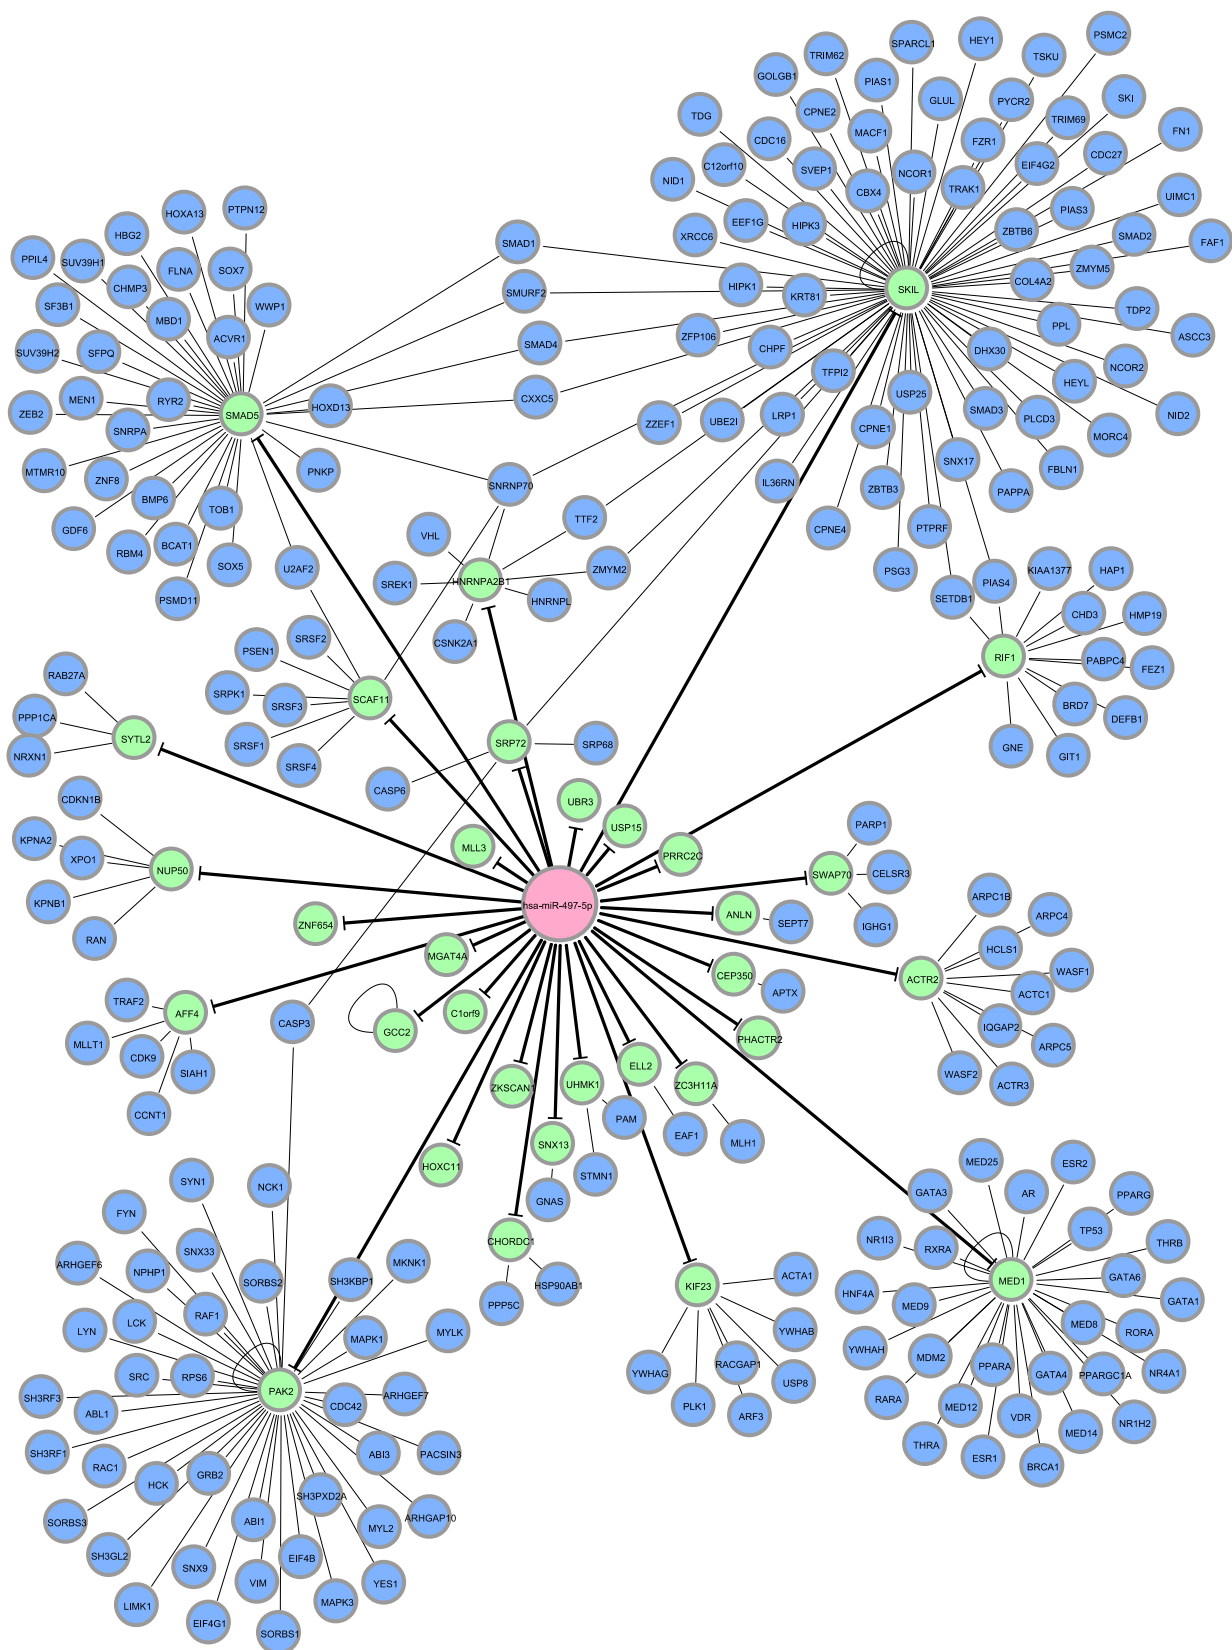



**Figure S13.** miRNA-regulated PIN. (hsa-miR-520d-3p). **Red:** miRNA; **green:** direct target of the miRNA; **blue:** proteins interacting with direct target of the miRNA.

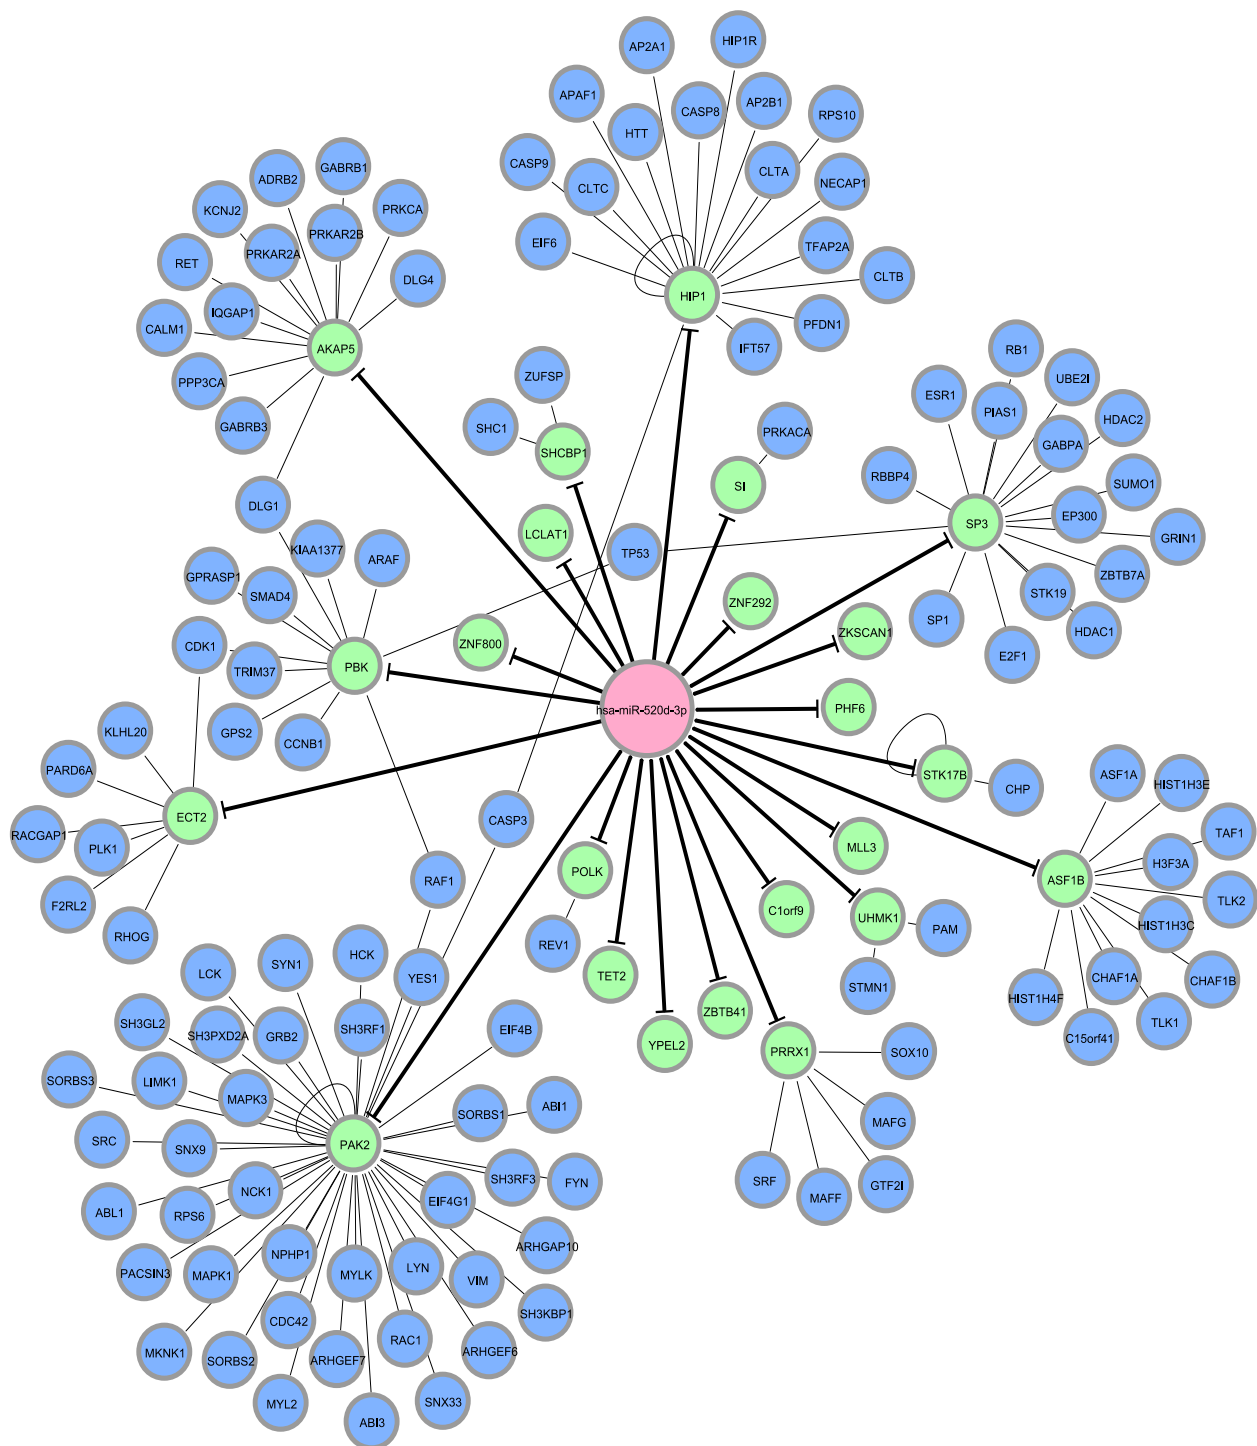

**Figure S14.** GOBO Kaplan-Meier survival curve of selected gene set with significant clinical outcome. (continue). The gene set was formed by selecting genes annotated with designated GO term in the miRNA-regulated PIN. Full GOBO Kaplan-Meier survival p-value were calculated and listed in Table 9. \*  $p < 0.05$ ; \*\*  $p < 0.01$ ; \*\*\*  $p < 0.001$ .

**MIMAT0000064 (hsa-let-7c)\*\*\***  
GO:0015630, Microtubule cytoskeleton  
all tumors : Subset= All tumors : Gene= MergedGeneSet

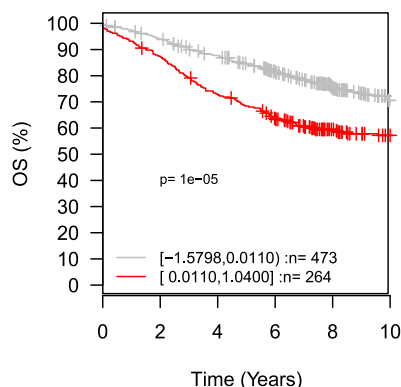

**MIMAT0000064 (hsa-let-7c)\***  
GO:0043069, Negative regulation of programmed cell death  
all tumors : Subset= All tumors : Gene= MergedGeneSet

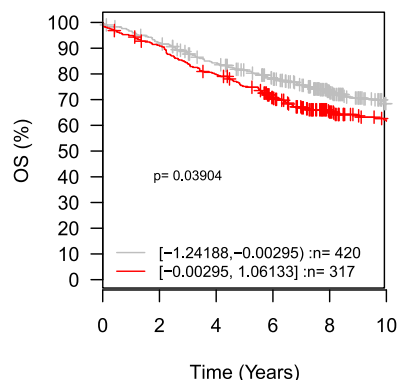

**MIMAT0000064 (hsa-let-7c)\***  
GO:0060548, Negative regulation of cell death  
all tumors : Subset= All tumors : Gene= MergedGeneSet

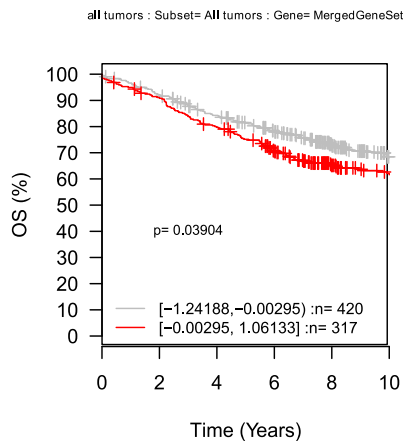

**MIMAT0000089 (hsa-miR-31-5p)\***  
GO:0006917, Induction of apoptosis  
all tumors : Subset= All tumors : Gene= MergedGeneSet

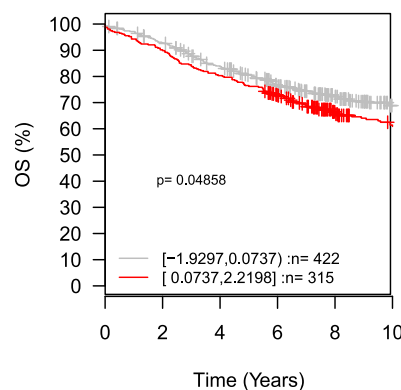

**MIMAT0000089 (hsa-miR-31-5p)\***  
GO:0012502, Induction of programmed cell death  
all tumors : Subset= All tumors : Gene= MergedGeneSet

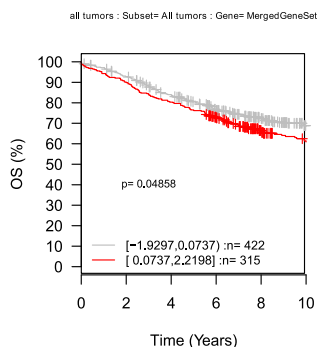

**MIMAT0000423 (hsa-miR-125b-5p)\***  
GO:0015630, Microtubule cytoskeleton  
all tumors : Subset= All tumors : Gene= MergedGeneSet

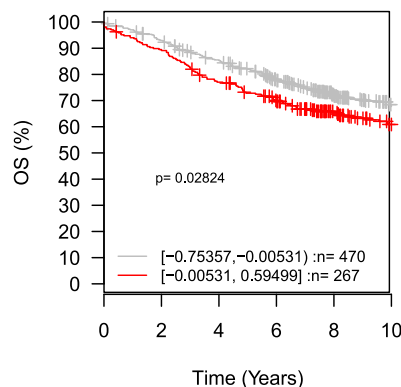



Figure S14. Cont.

**MIMAT0000423 (hsa-miR-125b-5p)\*\***

GO:0050678, Regulation of epithelial cell proliferation

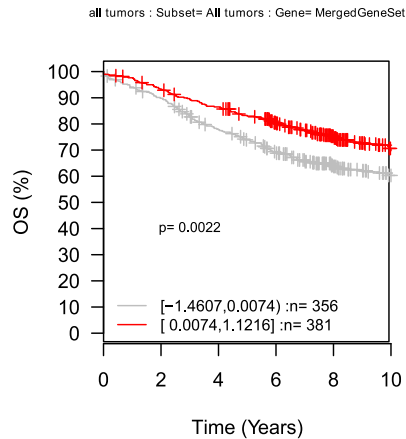**MIMAT0000443 (hsa-miR-125a-5p)\***

GO:0015630, Microtubule cytoskeleton

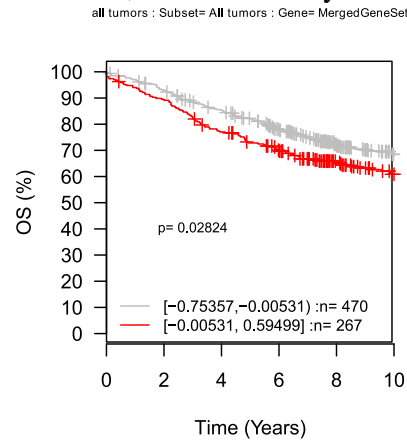**MIMAT0000443 (hsa-miR-125a-5p)\***

GO:0050678, Regulation of epithelial cell proliferation

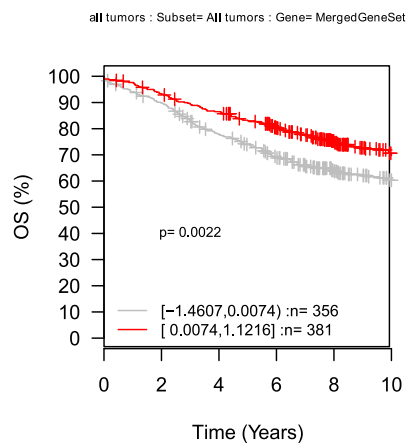**MIMAT0002820 (hsa-miR-497-5p)\***

GO:0007179, Transforming growth factor beta receptor signaling pathway

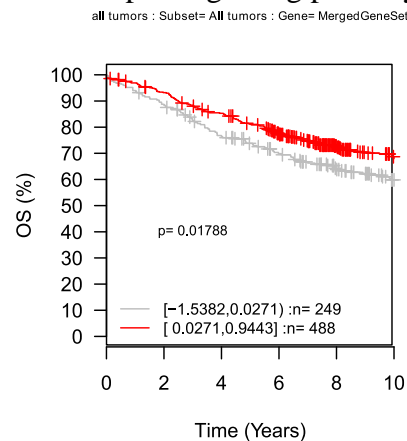**MIMAT0002856****(hsa-miR-520d-3p)\*\*\***

GO:0015630, Microtubule cytoskeleton

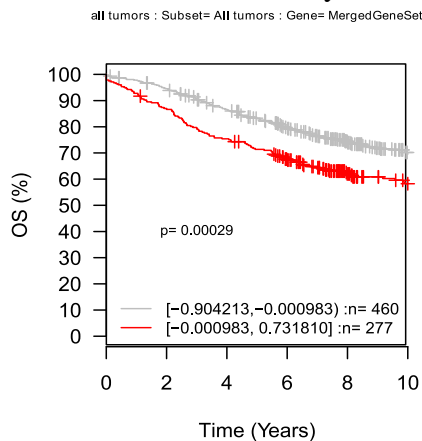**MIMAT0002856 (hsa-miR-520d-3p)\***

GO:0048011, Nerve growth factor receptor signaling pathway

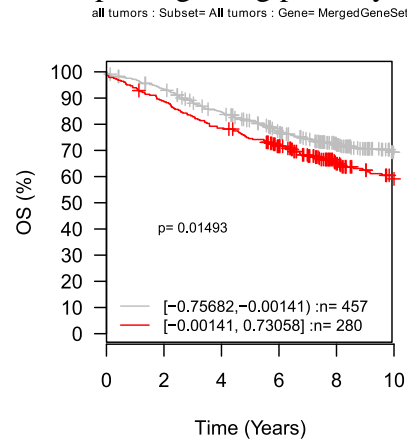

**Figure S14. Cont.****MIMAT0002856 (hsa-miR-520d-3p)\*\*\*****GO:0051988, Regulation of attachment of spindle  
microtubules to kinetochore**

all tumors : Subset= All tumors : Gene= MergedGeneSet

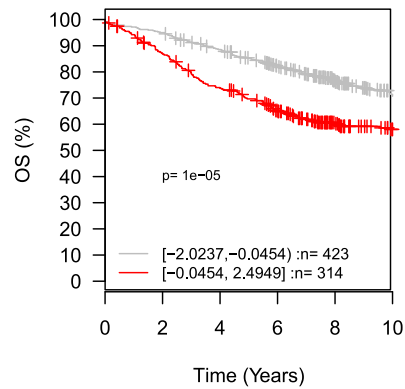

© 2013 by the authors; licensee MDPI, Basel, Switzerland. This article is an open access article distributed under the terms and conditions of the Creative Commons Attribution license (<http://creativecommons.org/licenses/by/3.0/>).
